# Supplementary material
Source: HighWire-hosted journal article supplement (https://ajnr-sso.highwirestaging.com/highwire/filestream/52504/field_highwire_adjunct_files/0/3858_figure.pdf)
Supplement: 3858_figure.pdf [file 3858_figure.pdf]

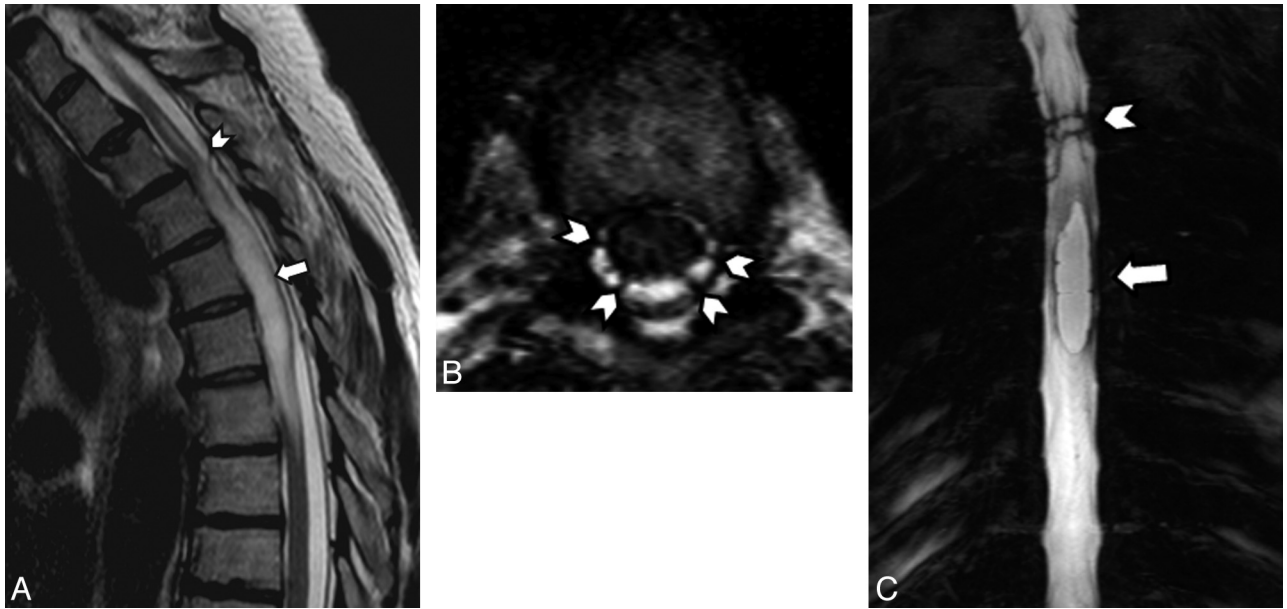

**ON-LINE FIG1.** Sagittal (A) and axial (B) T2-weighted MR images and MR imaging myelography (C). Note the syringomyelic cavity extending from levels T2 to T7 (*arrow*). Arachnoid adhesions occupy the subarachnoid space posterior and lateral to the cord (*arrowheads*). In this case, the syrinx appears more extended just below the level of the arachnoid thickening.
